1 **Altered hippocampal interneuron activity precedes ictal onset**

2

3 Mitra L. Miri<sup>1</sup>, Martin Vinck<sup>1</sup>, Rima Pant, and Jessica A. Cardin<sup>2</sup>

4 Department of Neuroscience, Yale University School of Medicine, New Haven CT

5 Kavli Institute, Yale University, New Haven CT

6 <sup>1</sup>These authors contributed equally.

7 <sup>2</sup>Corresponding author: [jess.cardin@yale.edu](mailto:jess.cardin@yale.edu)

8

9

10

11

12

13

14

15

16

17

18

19

20

21

22

23 **Summary**

24 Although failure of GABAergic inhibition is a commonly hypothesized mechanism underlying  
25 seizure disorders, the series of events that precipitate a rapid shift from healthy to ictal activity  
26 remain unclear. Furthermore, the diversity of inhibitory interneuron populations poses a  
27 challenge for understanding local circuit interactions during seizure initiation. Using a combined  
28 optogenetic and electrophysiological approach, we examined the activity of two identified  
29 hippocampal interneuron classes during seizure induction *in vivo*. We identified cell type-  
30 specific differences in preictal firing patterns and input sensitivity of parvalbumin- and  
31 somatostatin-expressing interneurons. Surprisingly, the impact of both sources of inhibition  
32 remained intact throughout the preictal period and into the early ictal phase. Our findings  
33 suggest that the onset of ictal activity is not due to a failure of inhibition, but is instead  
34 associated with a decoupling of inhibitory cells from their normal relationship with the local  
35 hippocampal network.

36

37 **Keywords**

38 Seizure, interneuron, parvalbumin, somatostatin, optogenetics, channelrhodopsin, inhibition,  
39 hippocampus, local field potential, ictal

40

41

42

43

44

45

46

47

48

49

50

51

52

53

## 54 Introduction

55

56 Seizure activity is commonly considered to arise from an imbalance of excitation and  
57 inhibition in vulnerable neural circuits, leading to unconstrained activity that self-organizes into  
58 patterns of hypersynchrony. One mechanism of such an imbalance may be a failure of  
59 GABAergic inhibition (Ziburkus et al., 2006). Acute blockade of GABA receptors rapidly initiates  
60 seizure activity (Rose and Blakemore, 1974; Treiman, 2001), suggesting the necessity of  
61 synaptic inhibition to maintain healthy activity patterns. Previous work has also highlighted the  
62 potential preictal contribution of excitatory GABAergic effects due to Cl<sup>-</sup> accumulation (Cossart  
63 et al., 2005; Palma et al., 2006; Miles et al., 2012) or loss of inhibition due to depletion of  
64 GABAergic release (Zhang et al., 2012). Developmental dysregulation of inhibitory interneurons  
65 causes chronic epileptic disorders (Lau et al., 2000; Rossignol et al., 2013; Tai et al., 2014), and  
66 interneurons also appear to be particularly sensitive to seizure-related damage (Sloviter, 1987;  
67 de Lanerolle et al., 1989; Robbins et al., 1991; Rice et al., 1996; Gibbs et al., 1997; Cossart et  
68 al., 2001). However, the circuit mechanisms underlying seizure initiation and the specific role of  
69 GABAergic interneurons remain largely unknown.

70 Work from *in vitro* and *in vivo* animal models has suggested that different neural  
71 populations may have distinct preictal roles in seizure initiation. Excitatory and inhibitory neuron  
72 activity has been found to increase preictally (Timofeev et al., 2002; Bower and Buckmaster,  
73 2008; Cymerblit-Sabba and Schiller, 2010; Jiruska et al., 2010; Grasse et al., 2013; Toyoda et  
74 al., 2015) or to be modulated in opposition before ictal onset (Ziburkus et al., 2006).  
75 Furthermore, recent work using single-unit recordings in human patients found stronger preictal  
76 activation of putative interneuron populations than other cells (Truccolo et al., 2011). However,  
77 one challenge in examining the respective roles of excitatory and inhibitory cells in seizure  
78 initiation is the diversity of inhibitory interneurons. Neocortical GABAergic interneurons exhibit a  
79 wide variety of morphologies, molecular markers, and activity patterns, and make synapses on  
80 different subcellular domains of target pyramidal cells (Rudy et al., 2011). In the hippocampus,  
81 these include the soma-targeting, axo-axonic and basket cells that co-express the calcium  
82 binding protein parvalbumin (PV) and the dendrite-targeting O-LM and bistratified interneurons  
83 that co-express the peptide somatostatin (SOM) (Buhl et al., 1994; Sik et al., 1995; Klausberger  
84 et al., 2003; Petilla Interneuron Nomenclature et al., 2008; Lapray et al., 2012). Despite their  
85 diverging cellular properties, these cell classes are difficult to identify *in vivo* using traditional  
86 recording methods.

87 Here we used optogenetic tools to identify, track, and probe two distinct populations of  
88 hippocampal interneurons, the PV- and SOM-expressing cells, in two models of acute seizure  
89 initiation *in vivo*. We find cell type-specific differences in the preictal activity of PV and SOM  
90 cells and in the evolution of their sensitivity to input. However, the inhibitory influence of  
91 interneuron firing on nearby neurons remains largely intact throughout the preictal and early ictal  
92 periods, suggesting that seizure does not arise from a failure of GABAergic inhibition.

93

## 94 **Results**

95 To examine the preictal activity of identified hippocampal interneurons, we performed  
96 tetrode recordings of isolated single units and local field potentials (LFPs) from hippocampal  
97 CA1 in anesthetized mice expressing Channelrhodopsin-2 (ChR2) in target cells. Seizure  
98 activity was induced with systemic administration of the chemoconvulsant Pentylentetrazol  
99 (PTZ) (Figure 1A). During the baseline period, we identified PV- (n = 56 cells in 45 mice) and  
100 SOM- (n = 42 cells in 34 mice) expressing interneurons in PV-Cre/ChR2 or SOM-Cre/ChR2  
101 mice, respectively, by their short-latency, low-jitter responses to blue light (Figure 1B; see  
102 Methods) (Cardin et al., 2009; Lima et al., 2009). On average, PV cells displayed narrow spike  
103 waveforms (Figures 1C and S1), whereas SOM cells exhibited a broader waveform distribution  
104 (Figure S1A). However, there was extensive overlap of waveform characteristics among the  
105 populations (Figure S1), indicating that spike waveform alone is not sufficient to distinguish cell  
106 types under these conditions. Histological analysis confirmed that the two identified interneuron  
107 populations were largely non-overlapping within CA1 (Figure S2). In a subset of experiments,  
108 unidentified cells (n = 49 cells in 26 mice) were simultaneously recorded along with ChR2-  
109 tagged units in PV-Cre and SOM-Cre mice or in the pyramidal cell layer of wild-type mice  
110 (Figure S1). A subset of these unidentified cells (n = 26 cells in 16 mice) were regular spiking  
111 (RS), putative excitatory cells with characteristic broad spike waveforms and relatively low  
112 baseline firing rates (Figures 1C and S1).

113 In an initial series of experiments, we assessed the spontaneous activity of these three  
114 cell classes during a baseline period and four preictal periods of equal duration leading into  
115 PTZ-induced seizure (Figure 1D). PV, SOM and RS cells exhibited increased firing rates  
116 following PTZ administration, but showed markedly different firing rate trajectories (Figure 1E).  
117 Strikingly, we found that most PV cells strongly increased their firing rate in the last preictal  
118 period as compared to the first (94.4%,  $p < 0.001$ , Binomial test) or third (83.3%,  $p < 0.001$ ; Figure  
119 S3). In contrast, this progressive, late increase in firing rate was not observed in SOM or RS

120 cells (Figures 1E and S3). Increased PV cell firing was independent of the latency to ictal onset  
121 (Figure S4) and was observed in the absence of significant changes in spike waveform  
122 amplitude over time (Figure S5). We next explored whether preictal firing rate changes were  
123 accompanied by changes in the temporal spike pattern. Immediately preceding ictal onset, PV,  
124 but not SOM or RS, cell firing became significantly more regular (i.e., less bursty) (Figure 2A). In  
125 addition, PV cells showed an increased tendency to fire spikes separated by short (<10ms)  
126 inter-spike-intervals (ISI; Figure S6). Unidentified cells with narrow spikes did not exhibit  
127 changes in firing rate, firing regularity, or ISI statistics (Figure S7).

128 In a separate series of experiments, we observed a similar increase in PV cell firing  
129 rates during the late preictal period preceding Pilocarpine-induced seizures (Figure S8),  
130 suggesting that this is not a unique feature of PTZ-induced seizures but rather may be a general  
131 feature of preictal activity in CA1. PV cells also showed increased regularity and shorter ISIs  
132 during preictal periods preceding Pilocarpine-induced seizures, in the absence of changes in  
133 spike waveform amplitude (Figure S8D).

134 The progressive changes in PV interneuron firing rate and temporal pattern suggest that  
135 the relationship between these cells and the surrounding local network may be altered prior to  
136 seizure initiation. We therefore computed the mean spike field coherence (SFC) for PV, SOM  
137 and RS cells during baseline activity and across the four preictal periods (Figure 2B). We  
138 observed a prominent peak in the 20-28Hz band of the LFP (Chen et al., 2011; Cabral et al.,  
139 2014; Sauer et al., 2015) under baseline and preictal conditions (Fig. 1A). PV cells showed a  
140 peak in SFC in the 20-28Hz frequency band that decreased significantly following PTZ  
141 administration (Figure 2B-C) in the absence of any loss in LFP power or changes in SFC in the  
142 theta or high gamma bands, other prominent hippocampal rhythms associated with interneuron  
143 activity (Figure S9). In contrast, neither SOM nor RS cells showed a change in SFC across the  
144 preictal periods, suggesting a specific decoupling of PV cells from their normal temporal  
145 relationship with the local hippocampal network during the onset of ictal activity.

146 Together, these findings highlight cell type-specific changes in PV interneuron activity  
147 leading up to the onset of ictal activity. To examine whether preictal changes in interneuron  
148 output were accompanied by changes in sensitivity to input, we tested the responses of PV and  
149 SOM cells to optogenetic stimulation during each preictal period. We measured the probability  
150 of interneuron spiking in response to light pulses of varying intensity (Figure 3A). PV cells  
151 showed no progressive change in the slope or maximal response ( $R_{max}$ ) of the input-output  
152 function (Figure 3B-C). In contrast, SOM cells showed a significant increase in slope and a

153 significant decrease in  $R_{max}$  across the preictal periods, suggesting a progressive preictal  
154 alteration in their sensitivity to inputs.

155 To assay whether the observed changes in interneuron activity were associated with  
156 altered inhibition of their targets, we measured the impact of ChR2-evoked interneuron spiking  
157 on the firing rate of nearby RS cells. During baseline activity, we found that the firing rate of RS  
158 cells decreased following ChR2-evoked PV and SOM cell spiking (Figure 4A-B). We compared  
159 the impact of ChR2-evoked inhibition during the four preictal periods and an additional period  
160 immediately following ictal onset. RS firing suppression was not significantly changed across  
161 the preictal and early ictal periods as compared to baseline when the PV cells were driven at  
162 either moderate or high light intensities (see Methods; Figure 4C-D). RS suppression by SOM  
163 cell spiking was likewise maintained throughout preictal and early ictal periods (Figure 4E-F).  
164 Thus, both PV- and SOM-mediated inhibition appear largely intact preceding ictal onset and  
165 remain so during the transition to ictal activity.

166 At the ictal transition, changes in interneuron activity mainly appeared to be at the level  
167 of firing rates, rather than postsynaptic impact on nearby RS cells. We next examined whether  
168 interneuron firing remained elevated during the ictal period. Rigorous spike waveform  
169 identification after ictal onset is highly challenging. However, we were able to track a subset of  
170 recorded neurons through an initial 60-second ictal period. We found that after ictal onset, PV  
171 and SOM firing decreased from the preictal peak back to baseline levels (Figure 5A,B). In  
172 contrast, RS cells continued to fire at elevated rates (Figure 5C), suggesting a sustained  
173 decoupling of excitatory and inhibitory spiking.

## 174 **Discussion**

175 During spontaneous and evoked neural activity, excitation and inhibition are tightly  
176 coupled in amplitude (Shu et al., 2003; Haider et al., 2006; Xue et al., 2014) and temporal  
177 pattern (Pouille and Scanziani, 2001; Wehr and Zador, 2003; Higley and Contreras, 2006;  
178 Cardin et al., 2010). Disruption of the excitatory-inhibitory balance profoundly alters circuit  
179 function (Fritschy, 2008; Ziburkus et al., 2013). We found that PV- and SOM-expressing  
180 interneurons and RS, putative excitatory cells exhibited different preictal firing rate trajectories.  
181 SOM and RS cells showed an early, modest increase in firing, whereas PV cells exhibited a late  
182 increase in firing immediately before ictal onset. During the early ictal period, PV and SOM cell  
183 firing rates returned to baseline levels, whereas RS cell firing remained elevated. These  
184 changes in PV and SOM cell firing rates occurred in the absence of changes in the impact of

185 ChR2-evoked inhibition on local RS cells. Overall, these results suggest that seizure did not  
186 arise from either an overall failure of GABAergic inhibition or from unconstrained excitation, but  
187 rather from a decoupling of excitatory and inhibitory activity.

188 Fast-spiking, PV-expressing interneurons are coupled to both high-frequency and theta  
189 rhythms in the hippocampus, and are thought to contribute to the fine temporal organization of  
190 excitatory-inhibitory interactions (Buzsaki et al., 2003; Csicsvari et al., 2003; Klausberger et al.,  
191 2003; Forro et al., 2015). The earliest preictal change we observed was a loss of the strong  
192 spike-field coherence of PV cell spiking to a prominent low-gamma band previously observed in  
193 mouse hippocampus (Chen et al., 2011; Cabral et al., 2014; Sauer et al., 2015). Thus, despite  
194 their increase in firing rate and decreased burstiness at the transition to ictal activity, PV  
195 interneurons were already decoupled from their precise temporal relationship with the  
196 surrounding local network prior to seizure initiation. Increased PV interneuron activity could lead  
197 to irregular firing patterns or bursts, potentially resulting in hyper-synchronized, pathological  
198 entrainment of excitatory activity (Yekhlief et al., 2015). Previous work has suggested that  
199 increased inhibitory synaptic activity or the onset of depolarization block in fast-spiking  
200 interneurons could precipitate seizure onset (Velazquez and Carlen, 1999; Timofeev et al.,  
201 2002; Fujiwara-Tsukamoto et al., 2007; Gnatkovsky et al., 2008). We found that the onset of  
202 ictal spikes coincided with a sharp increase in PV interneuron spiking. However, we found no  
203 evidence for decreased interneuron spike amplitude, suggesting that these interneurons did not  
204 enter depolarization block prior to ictal onset. In contrast to the PV interneurons, SOM  
205 interneurons showed an earlier increase in firing rate but no change in the temporal pattern of  
206 their spiking. SOM, but not PV, cells exhibited altered sensitivity to input and a decreased  
207 range of output responses during the late preictal period. This diminished dynamic range could  
208 compromise the ability of SOM cells to participate in balanced excitatory-inhibitory interactions  
209 within the local hippocampal circuit (Lovett-Barron et al., 2012; Royer et al., 2012).

210 Although PV and SOM interneuron populations showed increased activity during the  
211 preictal period, these changes were transient and not accompanied by reduced RS activity.  
212 Early preictal decoupling of PV cells from normal hippocampal rhythms was followed by a  
213 transient late preictal rise in PV interneuron firing that was not accompanied by a change in RS  
214 cell firing. In the early ictal period PV and SOM firing rates decreased, whereas RS activity  
215 remained stable at an elevated firing rate. The activity of interneuron and excitatory neuron  
216 populations was thus progressively decoupled in multiple ways during the transition to seizure.

217 Previous work has found extensive heterogeneity in preictal firing rate trajectories of  
218 extracellularly recorded putative excitatory and inhibitory neurons. Intracellular and extracellular  
219 recordings of fast-spiking, putative PV interneurons in the cortex and hippocampus have found  
220 increased preictal firing rates (Timofeev et al., 2002; Gnatkovsky et al., 2008) or a transient  
221 increase in firing immediately preceding ictal onset (Grasse et al., 2013). Some reports suggest  
222 increased firing of regular spiking putative excitatory neurons in the entorhinal cortex and  
223 hippocampus (Cymerblit-Sabba and Schiller, 2010; Jiruska et al., 2010; Fujita et al., 2014), but  
224 others found a mix of increases and decreases within multiple hippocampal areas (Bower and  
225 Buckmaster, 2008; Toyoda et al., 2015). To our knowledge, there are no previous data on the  
226 preictal firing rate trajectories of identified SOM interneurons. We found that identification by  
227 action potential waveform or baseline firing rate was not a reliable indicator of cell identity for  
228 hippocampal PV interneurons. In addition, in agreement with previous work (Klausberger et al.,  
229 2003; Halabisky et al., 2006; Katona et al., 2014), we found that SOM interneurons exhibited  
230 varied action potential durations and could not be distinguished from regular spiking excitatory  
231 neurons by waveform. Optical tagging with Cre-dependent ChR2 allowed identification of each  
232 population despite overlapping action potential characteristics. The three cell classes we  
233 examined demonstrated distinct trajectories, suggesting that some of the preictal heterogeneity  
234 observed in other studies may arise from a mixed population of unidentified cells.

235 We examined interneuron activity in two models of acute induction of status epilepticus,  
236 which may provide insight into the mechanisms by which normal, healthy neural circuits  
237 transition to pathological patterns of activation. We used both PTZ, thought to be a competitive  
238 antagonist of the GABA<sub>A</sub> receptor (Huang et al., 2001), and Pilocarpine, a nonselective  
239 muscarinic acetylcholine receptor agonist (Turski et al., 1989). Despite distinct pharmacological  
240 mechanisms, we found similar trajectories for PV interneuron activity in both models, suggesting  
241 that preictal increases in PV activity may be a common element of acute seizure initiation.  
242 Previous work on acute seizure induction likewise observed similar overall preictal firing rate  
243 trajectories across several models (Cymerblit-Sabba and Schiller, 2010). Because these drugs  
244 arrive rapidly in the brain at effective concentrations following systemic administration  
245 (Yonekawa et al., 1980; Ramzan and Levy, 1985), it is unlikely that the progression of  
246 interneuron firing changes from preictal to ictal periods resulted from gradual accumulation of  
247 chemoconvulsants in neural tissue. Our experiments were conducted under anesthesia to  
248 reduce movement artifacts and allow continued recording of small GABAergic neurons, and the  
249 presence of anesthetics could potentially prolong the preictal period and reduce seizure activity



250 (Muraio et al., 2002; Fang and Wang, 2015; Grover et al., 2016). However, the light anesthesia  
251 we used allowed normal spontaneous hippocampal firing patterns to be maintained and  
252 promoted short ictal onset delays.

253 Our data suggest that cell type-specific disruption of finely tuned interneuron  
254 relationships with the local hippocampal circuit may contribute to temporal reorganization of  
255 activity and decoupling of excitation and inhibition prior to seizure initiation. PV and SOM  
256 interneurons exhibited distinct profiles of preictal changes in firing and sensitivity to inputs. In  
257 particular, preictal disruption of PV interneurons is a common characteristic of incipient seizure  
258 in these two models of acute status epilepticus, and may be a promising element for further  
259 study of seizure initiation in models of chronic epilepsy. In addition, our findings highlight the  
260 complex involvement of distinct GABAergic interneuron populations in pathological activity in the  
261 hippocampal circuit.

262

## 262 **Figure Legends**

263

### 264 **Fig 1. Firing rate changes of ChR2-tagged interneurons precede seizure initiation**

265 **(A)** Upper: Schematic of experimental paradigm showing baseline, PTZ injection and preictal  
266 period leading up to ictal onset. Middle: LFP trace from hippocampal CA1 recording. Lower:  
267 Spectrogram showing LFP power as a function of time from ictal onset (x-axis) and frequency  
268 (y-axis; shown on log-10 scale). **(B)** Peri-pulse time-histogram around 5ms laser pulses together  
269 with raster plot during baseline for example PV- and SOM-expressing interneurons in PV-  
270 Cre/ChR2 and SOM-Cre/ChR2 mice, respectively. **(C)** Left: Averaged, normalized action  
271 potential waveforms for all recorded PV, SOM and putative RS cells. Right: Mean baseline firing  
272 rates (Hz) for PV, SOM and RS cells recorded from hippocampal CA1. **(D)** Spike trains for  
273 example PV, SOM and RS cells. All horizontal scale bars correspond to 20s. Note that cells  
274 were recorded from different animals that each had different latencies to ictal onset. **(E)** Mean  
275 changes in firing rate as compared to baseline over four preictal periods for PV (n = 18 cells in  
276 13 mice), SOM (n = 16 cells in 10 mice) and RS (n = 20 cells in 12 mice) populations. Note that  
277 pairwise statistical comparisons are only shown between 3<sup>rd</sup> and 4<sup>th</sup> preictal period. Error bars  
278 denote mean  $\pm$  s.e.m. \*p<0.05, \*\*p<0.01.

279

### 280 **Fig 2. Preictal changes in temporal patterning of interneuron activity**

281 **(A)** Mean changes in local variation (LV) of firing as compared to baseline over four preictal  
282 periods for PV, SOM and RS cells during acute PTZ seizure. LV is a measure of firing  
283 irregularity, where LV>1 indicates irregular firing (see Methods). **(B)** Left: Mean spike-field  
284 coherence (SFC) as a function of frequency (Hz) during baseline and four preictal periods for  
285 PV-expressing cells. Middle and right: Same for SOM and RS cells, respectively. **(C)** Mean  
286 changes in SFC in 20-28 Hz band as compared to baseline over four preictal periods for PV,  
287 SOM and RS cells. Error bars denote mean  $\pm$  s.e.m. \*p<0.05.

288

### 289 **Fig 3. Preictal changes in interneuron sensitivity to inputs**

290 **(A)** Response curve of spike probability as a function of light pulse intensity (mW/mm<sup>2</sup>) with  
291 sigmoid curve fit during baseline (black) and 4<sup>th</sup> preictal period (colors) for example PV (left) and  
292 SOM (right) cells. **(B)** Mean change in Rmax compared to baseline (dotted line) over four  
293 preictal periods for PV (n =17 cells in 15 mice) and SOM (n=21 cells in 20 mice) cells. **(C)** Mean  
294 modulation of the slope parameter compared to baseline over four preictal periods for PV and

295 SOM cells. **(B-C)** Significance to baseline: \* $p < 0.05$ , \*\* $p < 0.01$ , \*\*\* $p < 0.001$ . Error bars denote  
296 mean  $\pm$  s.e.m.

297

#### 298 **Fig 4. Intact preictal suppression of RS firing by evoked inhibition**

299 **(A)** Normalized firing rate (FR) as a function of time (s) from laser pulse onset ( $t=0$ ) for RS cells  
300 recorded simultaneously with PV cells in PV-Cre/ChR2 mice ( $n = 20$  cells in 12 mice) or  
301 recorded with SOM cells in SOM-Cre/ChR2 mice ( $n = 34$  cells in 16 mice) during baseline  
302 activity. For purposes of visualization, firing rates were normalized to the maximum firing rate for  
303 each cell. **(B)** Mean changes in baseline firing rate (Hz) of RS cells as a function of time (s) from  
304 laser pulse onset (dashed grey line). **(C)** Upper: Average firing rate of RS cells ( $n = 11$  cells in 8  
305 mice) recorded during PV/ChR2 experiments as a function of time (s) from laser pulse onset  
306 during baseline, the four preictal periods and a 60s period following ictal onset after PTZ  
307 administration (see Methods). Lower: Average firing rate of RS cells ( $n = 11$  cells in 7 mice)  
308 recorded during SOM/ChR2 experiments as a function of time (s) from laser pulse onset during  
309 baseline, the four preictal periods and following ictal onset. For these plots, we considered only  
310 light pulses of medium light intensity (see Methods). **(D)**. Mean modulation of firing rate (see  
311 Methods) after medium intensity laser pulse (0 to 50ms) compared to pre-pulse (-200 to 0ms)  
312 firing rate for RS cells recorded during PV/ChR2 (green) and SOM/ChR2 (blue) experiments.  
313 Modulation scores for RS in PV-Cre and RS in SOM-Cre were significantly different from zero  
314 for all periods. **(E)**. As in C, but for high intensity light pulses. **(F)** As in D, but for high intensity  
315 light pulses (see Methods). No significant changes were observed in modulation scores  
316 between periods for medium or high intensity pulses for either group. Error bars denote mean  $\pm$   
317 s.e.m.

318

#### 319 **Fig 5. Interneuron firing rates decrease after ictal onset.**

320 **(A)** Mean changes in firing rate as compared to baseline during four ictal periods for PV  
321 interneurons ( $n = 9$  cells in 8 mice). Firing rate in fourth ictal period was significantly lower than  
322 in fourth pre-ictal period for PV cells ( $p < 0.05$ ). **(B)** Mean ictal changes in SOM interneuron firing  
323 rate ( $n = 18$  cells in 17 mice). **(C)** Mean ictal changes in RS cell firing rate ( $n = 16$  cells in 9  
324 mice). Error bars denote mean  $\pm$  s.e.m. \* $p < 0.05$ , \*\* $p < 0.01$

325

326

327

328

329

## 329 **Experimental Procedures**

330

### 331 **Animals**

332 All experiments were approved by the Institutional Animal Care and Use Committee of Yale  
333 University. Experiments were performed using 2 to 6 month-old PV-Cre (Jackson Laboratory  
334 strain #008069) or SOM-Cre (Jackson Laboratory strain #013044) mice crossed with Ai32  
335 (Jackson Laboratory strain #012569) mice for expression of channelrhodopsin-2/EYFP fusion  
336 protein in Cre recombinase containing cells (Hippenmeyer et al., 2005; Taniguchi et al., 2011;  
337 Madisen et al., 2012). For immunohistological verification of the fidelity of the two Cre lines,  
338 they were also crossed to the tdTomato-expressing Ai9 line (Jackson Laboratory strain  
339 #007909)(Madisen et al., 2010).

340

### 341 **Acute seizure induction protocol**

342 Recordings were performed in mice anesthetized with .02ml ketamine (80mg/kg)/xylazine  
343 (5m/kg) administered by intraperitoneal (IP) injection before they were intubated, mechanically  
344 ventilated and then paralyzed using .024mg/g gallamine triethiodide (Sigma). Animals were then  
345 fixed in place with a headpost. A 200 $\mu$ m optical fiber was lowered through the cortex until it  
346 was ~200mm above the hippocampal CA1. Recording electrodes were then lowered into CA1  
347 and the optical fiber position was adjusted in small steps. Simultaneous recordings of isolated  
348 single units and LFPs were made during spontaneous baseline activity, when ChR2-expressing  
349 PV or SOM interneurons were identified with short pulses of light at 473nm, and during periods  
350 following chemoconvulsant administration. The preictal period was defined as the time from  
351 chemoconvulsant injection until the onset of ictal activity. In all experiments, seizures were  
352 induced pharmacologically with IP injection of either 120mg/kg PTZ, a GABA-A receptor  
353 antagonist, or 500mg/kg Pilocarpine, a muscarinic AChR agonist.

354

### 355 **Extracellular recordings**

356 All extracellular single-unit, multi-unit, and LFP recordings were made with custom-designed,  
357 moveable arrays of tetrodes manufactured in the lab from Formvar-coated tungsten wire  
358 (12.5 $\mu$ m diameter; California Fine Wire, Grover Beach CA). Tetrodes were targeted to the CA1  
359 field of the dorsal hippocampus (AP: +1.5-2mm; ML: 1.2-1.75, Franklin and Paxinos, 2001).  
360 Signals were digitized and recorded with a DigitalLynx 4SX system (Neuralynx, Bozeman MT).  
361 All data were sampled at 40kHz and recordings were referenced to the cerebellum. LFP data

362 were recorded with a bandpass 0.1-9000Hz filter and single-unit data was bandpass filtered  
363 between 600-9000Hz.

364

### 365 **Optogenetic manipulations**

366 Light activation of ChR2-expressing cells was performed using a 473nm laser (OptoEngine LLC,  
367 Midvale UT). A 200 $\mu$ m fiber was positioned on the cortical surface next to the electrode array  
368 and lowered slowly into the cortical tissue directly above dorsal hippocampal CA1. To avoid  
369 heating of the brain, we calibrated the light power (<75mW/mm<sup>2</sup>) during ChR2 unit tracking  
370 experiments in order to ensure a mean spike probability of ~1 spikes per 5 ms light pulse in the  
371 targeted population. Real-time output power for each laser was monitored using a photodiode  
372 and recorded continuously during the experiment. During baseline periods, we identified ChR2-  
373 expressing interneurons using short (5 ms) pulses of blue light, relying on the short latency of  
374 ChR2-evoked spikes and the high degree of temporal precision of the evoked spikes. In a  
375 subset of experiments (Fig 3-4), we measured the input-output function of ChR2-identified  
376 interneurons in response to a calibrated range of light intensities.

377

### 378 **Spike sorting**

379 Spikes were clustered semi-automatically using the following procedure. We first used the  
380 KlustaKwik 3.0 software (Kadir, 2013) to identify a maximum of 30 clusters using the waveform  
381 energy and energy of the waveform's first derivative as clustering features. We then used a  
382 modified version of the M-Clust environment to manually separate units. Units were accepted if  
383 a clear separation of the cell relative to all the other noise clusters was observed, which  
384 generally was the case when a conventional metric of cluster separation, isolation distance (ID)  
385 (Schmitzer-Torbert et al., 2005) exceeded 20 (Vinck et al., 2015). We further ensured that  
386 maximum contamination of the ISI (Inter-spike-interval) histogram did not exceed 0.1% at 1.5  
387 ms. To analyze the firing rates of cells after ictal onset, we manually determined the last point at  
388 which cluster separation from the noise was clearly visible. Only cells whose ictal activity could  
389 be tracked for at least 60s were included in the ictal period analysis.

390

### 391 **Data analysis tools**

392 All data was analyzed using the Mathworks Fieldtrip toolbox (in particular the Spike toolbox) and  
393 custom-made Matlab (The Mathworks, Natick MA) and Igor (WaveMetrics, Lake Oswego, OR)  
394 scripts (M. Miri and M. Vinck).

395

### 396 **Analysis of waveform parameters**

397 For each isolated single unit, we computed an average spike waveform for all channels of a  
398 tetrode. The waveforms were manually inspected and the channel with the largest peak-to-  
399 trough amplitude was used to measure the peak-to-trough duration values (Fig. 1 Supplement  
400 1) as well as mean spike amplitude (Fig. 1 Supplement 5). We also computed the repolarization  
401 value of the normalized (between -1 and +1) waveforms at 0.9 ms (similar to Vinck et al., 2015).  
402 Non-light-driven units were defined as RS cells by their broad waveform, defined as a  
403 repolarization value at 0.9ms smaller than -0.35.

404

### 405 **Seizure detection**

406 Ictal onset was identified by examining hippocampal CA1 LFP recordings, and was defined as  
407 the first occurrence of an ictal spike following injection of the chemoconvulsant. This generally  
408 corresponded to the LFP trace crossing an absolute z-score value >5 as compared to baseline.  
409 Sustained, elevated z-scores were generally observed after ictal onset, and ictal onset was  
410 typically coincident with the first ictal spike. We used spectrograms to validate that there were  
411 no consistent LFP changes prior to ictal onset (Fig 1A). Spectrograms of LFP power around ictal  
412 onset were computed using a wavelet transform with 7 cycles for each frequency and a Hanning  
413 taper. LFP power was normalized by dividing by the summed power across the entire trace and  
414 taking the base-10 logarithm.

415

### 416 **Definition of analysis periods**

417 Seizure latency varied across mice (Figure S4). For each experiment, the preictal period from  
418 injection to ictal onset was therefore divided into four equal periods. To characterize the  
419 progressive changes in hippocampal CA1 preictal activity (Figs 1-2), we computed the change  
420 in firing activity parameters as compared to baseline for the four preictal periods. For the  
421 analysis of spontaneous activity, we only used baseline and preictal periods that did not contain  
422 epochs of laser pulses and selected cells with baseline firing rates greater than 0.1Hz. For the  
423 analyses of evoked activity in Figures 3-4, all cells were used. For the analysis of RS  
424 suppression by ChR2-evoked inhibition, we defined an additional early ictal period as the 60s  
425 following ictal onset. For analysis of ictal spiking, we used only the subset of interneurons  
426 whose ictal spike activity could be resolved and we divided the 60s ictal period into four periods  
427 of 15s each.

428

### 429 **Firing rate and bursting**

430 The mean firing rate per analysis period was computed as the number of spikes in that period  
431 divided by the duration of that period in seconds. Changes in the temporal patterning of preictal  
432 firing were detected using two metrics. First, we quantified the propensity to engage in irregular  
433 burst firing using the coefficient of local variation (LV; Fig 2A), which has been shown to be  
434 robust against non-stationarities in firing rates. LV values greater than 1 indicate irregular firing,  
435 whereas LV values smaller than 1 indicate sub-Poisson regular firing (Shimokawa and  
436 Shinomoto, 2009) . Second, we computed the log fraction of ISIs between 2 and 10 ms over the  
437 fraction of ISIs between 10 and 100 ms, i.e.,  $\text{Log}(\text{ISI}_{\text{short}}/\text{ISI}_{\text{long}})$ , as in Vinck et al. (2015).

438

### 439 **Spike-field locking and LFP power**

440 Spike-field locking (Fig 2B-C) was computed using the Pairwise Phase Consistency, a measure  
441 of phase consistency that is not biased by the firing rate or the number of spikes (Vinck et al.,  
442 2012). Spike-LFP phases were computed for each spike and frequency separately by  
443 computing the Discrete Fourier Transform of Hanning-tapered LFP segments. These segments  
444 had a duration of 7 cycles per frequency. LFP power (Fig. 2 Supplement 4) was computed by  
445 dividing the signal into 1s segments and computing the DFT with a Hanning taper. We then  
446 averaged the LFP power in the 20-28 Hz band.

447

### 448 **Histology**

449 PV-Cre/Ai9 and SOM-Cre/Ai9 reporter mice were anesthetized with isoflurane and then  
450 transcardially perfused through the left ventricle using a peristaltic pump with 0.9% saline  
451 solution, followed by 4% paraformaldehyde in 0.1 M phosphate buffer (PB). The brains were  
452 removed from the skulls, post-fixed in the same solution at room temperature for 45 mins, and  
453 cryoprotected by immersion in 15% and 30% sucrose solutions in PB at 4 °C until they sank.  
454 Brains were stored in a -70 °C freezer for further analysis. Coronal sections (20 μm) from  
455 hippocampal Ca1 were obtained from each brain using a cryostat (Leica) at -20 °C and  
456 collected onto a slide. The sections were carefully washed and treated blocked against non-  
457 specific binding with 2% normal goat serum in PB containing 0.1% Triton X-100 (PB-TX) for one  
458 hour at room temperature and then incubated with either monoclonal PV (monoclonal; 1:500;  
459 Sigma) or SOM (monoclonal; 1:200; Millipore) antibody overnight at 4°C. All sections were  
460 again washed in PB-TX and then incubated in an Alexa 488 secondary antibody (1:1000;  
461 Invitrogen) for 1 hour at room temperature. Finally, the sections were rinsed in PB and DAPI  
462 was added before slides were cover-slipped. Immunostaining and counting was performed on a  
463 minimum of three coronal sections from at least three PV-Cre/Ai9 or SOM-Cre/Ai9 animals for

464 each respective condition. Hippocampal analyses were carried out in CA1 and ImageJ (Wayne  
465 Rasband, NIH) was used for image processing and counting. To minimize counting bias, we  
466 compared sections of equivalent bregma positions (from -1.5 mm to -2.0 mm relative to  
467 bregma), defined according to the Mouse Brain atlas (Franklin and Paxinos, 2001).

468

### 469 **Response curves**

470 In a subset of experiments (Fig 3), we measured the input-output function of ChR2-identified  
471 interneurons in response to a calibrated range of light intensities. We then made a sigmoid fit of  
472 the probability of spiking as a function of light intensity. This sigmoid fit was defined as

473

$$474 \quad p(I) = B + \frac{S}{1 + \exp(-I - cA)}$$

475

476 Here,  $p(I)$  is the fitted probability of a spike in the 2-15ms following laser pulse onset,  $I$  is the  
477 laser intensity,  $S$  is a scaling factor,  $c$  is the  $c50$ , and  $1/A$  is the slope. The  $R_{max}$  was defined as  
478 the value of  $p(I)$  at the maximum laser intensity tested. We fitted these curves by minimizing the  
479 absolute deviation between fit and data (i.e., the L1 norm) using MATLAB's *fminsearch* function.  
480 To avoid finding a local minimum, we randomly chose 64 different starting values for the  
481 different parameters and selected the fit that minimized the error across all 64 initializations.

482

### 483 **RS cell inhibition**

484 During a subset of our recordings in PV-Cre/ChR2 and SOM-Cre/ChR2 mice, we  
485 simultaneously recorded the activity of local RS cells, defined as described above, and  
486 monitored changes in preictal and early ictal inhibition of these units. To quantify the extent to  
487 which RS cells were inhibited following the light pulses, we compared their firing rates in the  
488 50ms period post light pulses ( $FR_{post}$ ) with their firing rate in the 200ms prior to light pulses  
489 ( $FR_{pre}$ ). We then computed the modulation of RS firing rates (Fig 3C-D) as

490

$$491 \quad y = \frac{FR_{post} - FR_{pre}}{FR_{post} + FR_{pre}}.$$

492

493 We computed this modulation separately for pulses of medium and high intensity (Fig 4C-D).  
494 The medium intensity level was defined as the level at which the simultaneously driven PV cells  
495 had, on average, a 50% firing probability. The highest intensity level was the level at which the  
496 simultaneously recorded PV cell spiking reached its maximum spike probability.

497



498 **Statistical testing**

499 Paired and unpaired Rank Wilcoxon tests were used throughout the manuscript to avoid the  
500 assumptions made by parametric statistical tests.

501

502

503

503 **Acknowledgements**

504 The authors thank M. Higley for comments on the manuscript and H. Blumenfeld for discussion  
505 of seizure models. This work was funded by an NSF graduate fellowship and a Ford  
506 Foundation graduate fellowship to M.L.M, a Rubicon (NWO) postdoctoral fellowship and a  
507 Human Frontiers postdoctoral fellowship to M.V, and a Klingenstein fellowship, a Whitehall  
508 grant, an Alfred P. Sloan Fellowship, NIH grant R01 EY022951, and a grant from the Swebilius  
509 Foundation to J.A.C.

510

511 **Author Contributions**

512 M.L.M. and J.A.C. designed experiments. M.L.M. performed the experiments. M.L.M. and R.P.  
513 performed immunohistochemistry. M.L.M. and M.V. analyzed the data. M.M., M.V., and J.A.C.  
514 wrote the paper.

515

516 **Competing Interests**

517 The authors declare no competing interests

518  
519  
520

520

- 521 Bower MR, Buckmaster PS (2008) Changes in granule cell firing rates precede locally recorded  
522 spontaneous seizures by minutes in an animal model of temporal lobe epilepsy. *J*  
523 *Neurophysiol* 99:2431-2442.
- 524 Buhl EH, Halasy K, Somogyi P (1994) Diverse sources of hippocampal unitary inhibitory  
525 postsynaptic potentials and the number of synaptic release sites. *Nature* 368:823-828.
- 526 Buzsaki G, Buhl DL, Harris KD, Csicsvari J, Czeh B, Morozov A (2003) Hippocampal network  
527 patterns of activity in the mouse. *Neuroscience* 116:201-211.
- 528 Cabral HO, Vinck M, Fouquet C, Pennartz CM, Rondi-Reig L, Battaglia FP (2014) Oscillatory  
529 dynamics and place field maps reflect hippocampal ensemble processing of sequence  
530 and place memory under NMDA receptor control. *Neuron* 81:402-415.
- 531 Cardin JA, Kumbhani RD, Contreras D, Palmer LA (2010) Cellular mechanisms of temporal  
532 sensitivity in visual cortex neurons. *J Neurosci* 30:3652-3662.
- 533 Cardin JA, Carlen M, Meletis K, Knoblich U, Zhang F, Deisseroth K, Tsai LH, Moore CI (2009)  
534 Driving fast-spiking cells induces gamma rhythm and controls sensory responses.  
535 *Nature* 459:663-667.
- 536 Chen Z, Resnik E, McFarland JM, Sakmann B, Mehta MR (2011) Speed controls the amplitude  
537 and timing of the hippocampal gamma rhythm. *PLoS One* 6:e21408.
- 538 Cossart R, Bernard C, Ben-Ari Y (2005) Multiple facets of GABAergic neurons and synapses:  
539 multiple fates of GABA signalling in epilepsies. *Trends in neurosciences* 28:108-115.
- 540 Cossart R, Dinocourt C, Hirsch JC, Merchan-Perez A, De Felipe J, Ben-Ari Y, Esclapez M,  
541 Bernard C (2001) Dendritic but not somatic GABAergic inhibition is decreased in  
542 experimental epilepsy. *Nat Neurosci* 4:52-62.
- 543 Csicsvari J, Jamieson B, Wise KD, Buzsaki G (2003) Mechanisms of gamma oscillations in the  
544 hippocampus of the behaving rat. *Neuron* 37:311-322.
- 545 Cymerblit-Sabba A, Schiller Y (2010) Network dynamics during development of  
546 pharmacologically induced epileptic seizures in rats in vivo. *J Neurosci* 30:1619-1630.
- 547 de Lanerolle NC, Kim JH, Robbins RJ, Spencer DD (1989) Hippocampal interneuron loss and  
548 plasticity in human temporal lobe epilepsy. *Brain Res* 495:387-395.
- 549 Fang Y, Wang X (2015) Ketamine for the treatment of refractory status epilepticus. *Seizure*  
550 30:14-20.
- 551 Forro T, Valenti O, Lasztocki B, Klausberger T (2015) Temporal organization of GABAergic  
552 interneurons in the intermediate CA1 hippocampus during network oscillations. *Cereb*  
553 *Cortex* 25:1228-1240.
- 554 Fritschy JM (2008) Epilepsy, E/I Balance and GABA(A) Receptor Plasticity. *Front Mol Neurosci*  
555 1:5.
- 556 Fujita S, Toyoda I, Thamattoor AK, Buckmaster PS (2014) Preictal activity of subicular, CA1,  
557 and dentate gyrus principal neurons in the dorsal hippocampus before spontaneous  
558 seizures in a rat model of temporal lobe epilepsy. *J Neurosci* 34:16671-16687.
- 559 Fujiwara-Tsukamoto Y, Isomura Y, Imanishi M, Fukai T, Takada M (2007) Distinct types of ionic  
560 modulation of GABA actions in pyramidal cells and interneurons during electrical  
561 induction of hippocampal seizure-like network activity. *Eur J Neurosci* 25:2713-2725.
- 562 Gibbs JW, 3rd, Sombati S, DeLorenzo RJ, Coulter DA (1997) Physiological and  
563 pharmacological alterations in postsynaptic GABA(A) receptor function in a hippocampal  
564 culture model of chronic spontaneous seizures. *J Neurophysiol* 77:2139-2152.
- 565 Gnatkovsky V, Librizzi L, Trombin F, de Curtis M (2008) Fast activity at seizure onset is  
566 mediated by inhibitory circuits in the entorhinal cortex in vitro. *Annals of neurology*  
567 64:674-686.
- 568 Grasse DW, Karunakaran S, Moxon KA (2013) Neuronal synchrony and the transition to  
569 spontaneous seizures. *Exp Neurol* 248:72-84.

- 570 Grover EH, Nazzal Y, Hirsch LJ (2016) Treatment of Convulsive Status Epilepticus. Current  
571 treatment options in neurology 18:11.
- 572 Haider B, Duque A, Hasenstaub AR, McCormick DA (2006) Neocortical network activity in vivo  
573 is generated through a dynamic balance of excitation and inhibition. *J Neurosci* 26:4535-  
574 4545.
- 575 Halabisky B, Shen F, Huguenard JR, Prince DA (2006) Electrophysiological classification of  
576 somatostatin-positive interneurons in mouse sensorimotor cortex. *J Neurophysiol*  
577 96:834-845.
- 578 Higley MJ, Contreras D (2006) Balanced excitation and inhibition determine spike timing during  
579 frequency adaptation. *J Neurosci* 26:448-457.
- 580 Hippenmeyer S, Vrieseling E, Sigrist M, Portmann T, Laengle C, Ladle DR, Arber S (2005) A  
581 developmental switch in the response of DRG neurons to ETS transcription factor  
582 signaling. *PLoS Biol* 3:e159.
- 583 Huang RQ, Bell-Horner CL, Dibas MI, Covey DF, Drewe JA, Dillon GH (2001)  
584 Pentylentetrazole-induced inhibition of recombinant gamma-aminobutyric acid type A  
585 (GABA(A)) receptors: mechanism and site of action. *J Pharmacol Exp Ther* 298:986-  
586 995.
- 587 Jiruska P, Csicsvari J, Powell AD, Fox JE, Chang WC, Vreugdenhil M, Li X, Palus M, Bujan AF,  
588 Dearden RW, Jefferys JG (2010) High-frequency network activity, global increase in  
589 neuronal activity, and synchrony expansion precede epileptic seizures in vitro. *J*  
590 *Neurosci* 30:5690-5701.
- 591 Katona L, Lapray D, Viney TJ, Oulhaj A, Borhegyi Z, Micklem BR, Klausberger T, Somogyi P  
592 (2014) Sleep and movement differentiates actions of two types of somatostatin-  
593 expressing GABAergic interneuron in rat hippocampus. *Neuron* 82:872-886.
- 594 Klausberger T, Magill PJ, Marton LF, Roberts JD, Cobden PM, Buzsaki G, Somogyi P (2003)  
595 Brain-state- and cell-type-specific firing of hippocampal interneurons in vivo. *Nature*  
596 421:844-848.
- 597 Lapray D, Lasztozci B, Lagler M, Viney TJ, Katona L, Valenti O, Hartwich K, Borhegyi Z,  
598 Somogyi P, Klausberger T (2012) Behavior-dependent specialization of identified  
599 hippocampal interneurons. *Nat Neurosci* 15:1265-1271.
- 600 Lau D, Vega-Saenz de Miera EC, Contreras D, Ozaita A, Harvey M, Chow A, Noebels JL,  
601 Paylor R, Morgan JI, Leonard CS, Rudy B (2000) Impaired fast-spiking, suppressed  
602 cortical inhibition, and increased susceptibility to seizures in mice lacking Kv3.2 K+  
603 channel proteins. *J Neurosci* 20:9071-9085.
- 604 Lima SQ, Hromadka T, Znamenskiy P, Zador AM (2009) PINP: a new method of tagging  
605 neuronal populations for identification during in vivo electrophysiological recording. *PLoS*  
606 *One* 4:e6099.
- 607 Lovett-Barron M, Turi GF, Kaifosh P, Lee PH, Bolze F, Sun XH, Nicoud JF, Zemelman BV,  
608 Sternson SM, Losonczy A (2012) Regulation of neuronal input transformations by  
609 tunable dendritic inhibition. *Nat Neurosci* 15:423-430, S421-423.
- 610 Madisen L, Zwingman TA, Sunkin SM, Oh SW, Zariwala HA, Gu H, Ng LL, Palmiter RD,  
611 Hawrylycz MJ, Jones AR, Lein ES, Zeng H (2010) A robust and high-throughput Cre  
612 reporting and characterization system for the whole mouse brain. *Nat Neurosci* 13:133-  
613 140.
- 614 Madisen L et al. (2012) A toolbox of Cre-dependent optogenetic transgenic mice for light-  
615 induced activation and silencing. *Nat Neurosci* 15:793-802.
- 616 Miles R, Blaesse P, Huberfeld G, Wittner L, Kaila K (2012) Chloride homeostasis and GABA  
617 signaling in temporal lobe epilepsy. In: Jasper's Basic Mechanisms of the Epilepsies, 4th  
618 Edition (Noebels JL, Avoli M, Rogawski MA, Olsen RW, Delgado-Escueta AV, eds).  
619 Bethesda (MD).

- 620 Murao K, Shingu K, Miyamoto E, Ikeda S, Nakao S, Masuzawa M, Yamada M (2002)  
621 Anticonvulsant effects of sevoflurane on amygdaloid kindling and bicuculline-induced  
622 seizures in cats: comparison with isoflurane and halothane. *Journal of anesthesia* 16:34-  
623 43.
- 624 Palma E, Amici M, Sobrero F, Spinelli G, Di Angelantonio S, Ragozzino D, Mascia A, Scoppetta  
625 C, Esposito V, Miledi R, Eusebi F (2006) Anomalous levels of Cl<sup>-</sup> transporters in the  
626 hippocampal subiculum from temporal lobe epilepsy patients make GABA excitatory.  
627 *Proc Natl Acad Sci U S A* 103:8465-8468.
- 628 Petilla Interneuron Nomenclature G et al. (2008) Petilla terminology: nomenclature of features of  
629 GABAergic interneurons of the cerebral cortex. *Nat Rev Neurosci* 9:557-568.
- 630 Pouille F, Scanziani M (2001) Enforcement of temporal fidelity in pyramidal cells by somatic  
631 feed-forward inhibition. *Science* 293:1159-1163.
- 632 Ramzan IM, Levy G (1985) Kinetics of drug action in disease states. XIV. Effect of infusion rate  
633 on pentylenetetrazol concentrations in serum, brain and cerebrospinal fluid of rats at  
634 onset of convulsions. *J Pharmacol Exp Ther* 234:624-628.
- 635 Rice A, Rafiq A, Shapiro SM, Jakoi ER, Coulter DA, DeLorenzo RJ (1996) Long-lasting  
636 reduction of inhibitory function and gamma-aminobutyric acid type A receptor subunit  
637 mRNA expression in a model of temporal lobe epilepsy. *Proc Natl Acad Sci U S A*  
638 93:9665-9669.
- 639 Robbins RJ, Brines ML, Kim JH, Adrian T, de Lanerolle N, Welsh S, Spencer DD (1991) A  
640 selective loss of somatostatin in the hippocampus of patients with temporal lobe  
641 epilepsy. *Annals of neurology* 29:325-332.
- 642 Rose D, Blakemore C (1974) Effects of bicuculline on functions of inhibition in visual cortex.  
643 *Nature* 249:375-377.
- 644 Rossignol E, Kruglikov I, van den Maagdenberg AM, Rudy B, Fishell G (2013) CaV 2.1 ablation  
645 in cortical interneurons selectively impairs fast-spiking basket cells and causes  
646 generalized seizures. *Annals of neurology* 74:209-222.
- 647 Royer S, Zemelman BV, Losonczy A, Kim J, Chance F, Magee JC, Buzsaki G (2012) Control of  
648 timing, rate and bursts of hippocampal place cells by dendritic and somatic inhibition.  
649 *Nat Neurosci* 15:769-775.
- 650 Rudy B, Fishell G, Lee S, Hjerling-Leffler J (2011) Three groups of interneurons account for  
651 nearly 100% of neocortical GABAergic neurons. *Developmental neurobiology* 71:45-61.
- 652 Sauer JF, Struber M, Bartos M (2015) Impaired fast-spiking interneuron function in a genetic  
653 mouse model of depression. *eLife* 4.
- 654 Schmitzer-Torbert N, Jackson J, Henze D, Harris K, Redish AD (2005) Quantitative measures of  
655 cluster quality for use in extracellular recordings. *Neuroscience* 131:1-11.
- 656 Shimokawa T, Shinomoto S (2009) Estimating instantaneous irregularity of neuronal firing.  
657 *Neural computation* 21:1931-1951.
- 658 Shu Y, Hasenstaub A, McCormick DA (2003) Turning on and off recurrent balanced cortical  
659 activity. *Nature* 423:288-293.
- 660 Sik A, Penttonen M, Ylinen A, Buzsaki G (1995) Hippocampal CA1 interneurons: an in vivo  
661 intracellular labeling study. *J Neurosci* 15:6651-6665.
- 662 Sloviter RS (1987) Decreased hippocampal inhibition and a selective loss of interneurons in  
663 experimental epilepsy. *Science* 235:73-76.
- 664 Tai C, Abe Y, Westenbroek RE, Scheuer T, Catterall WA (2014) Impaired excitability of  
665 somatostatin- and parvalbumin-expressing cortical interneurons in a mouse model of  
666 Dravet syndrome. *Proc Natl Acad Sci U S A* 111:E3139-3148.
- 667 Taniguchi H, He M, Wu P, Kim S, Paik R, Sugino K, Kvitsiani D, Fu Y, Lu J, Lin Y, Miyoshi G,  
668 Shima Y, Fishell G, Nelson SB, Huang ZJ (2011) A resource of Cre driver lines for  
669 genetic targeting of GABAergic neurons in cerebral cortex. *Neuron* 71:995-1013.

- 670 Timofeev I, Grenier F, Steriade M (2002) The role of chloride-dependent inhibition and the  
671 activity of fast-spiking neurons during cortical spike-wave electrographic seizures.  
672 *Neuroscience* 114:1115-1132.
- 673 Toyoda I, Fujita S, Thamattoor AK, Buckmaster PS (2015) Unit Activity of Hippocampal  
674 Interneurons before Spontaneous Seizures in an Animal Model of Temporal Lobe  
675 Epilepsy. *J Neurosci* 35:6600-6618.
- 676 Treiman DM (2001) GABAergic mechanisms in epilepsy. *Epilepsia* 42 Suppl 3:8-12.
- 677 Truccolo W, Donoghue JA, Hochberg LR, Eskandar EN, Madsen JR, Anderson WS, Brown EN,  
678 Halgren E, Cash SS (2011) Single-neuron dynamics in human focal epilepsy. *Nat*  
679 *Neurosci* 14:635-641.
- 680 Turski L, Ikonomidou C, Turski WA, Bortolotto ZA, Cavalheiro EA (1989) Review: cholinergic  
681 mechanisms and epileptogenesis. The seizures induced by pilocarpine: a novel  
682 experimental model of intractable epilepsy. *Synapse* 3:154-171.
- 683 Velazquez JL, Carlen PL (1999) Synchronization of GABAergic interneuronal networks during  
684 seizure-like activity in the rat horizontal hippocampal slice. *Eur J Neurosci* 11:4110-4118.
- 685 Vinck M, Batista-Brito R, Knoblich U, Cardin JA (2015) Arousal and locomotion make distinct  
686 contributions to cortical activity patterns and visual encoding. *Neuron* 86:740-754.
- 687 Wehr M, Zador AM (2003) Balanced inhibition underlies tuning and sharpens spike timing in  
688 auditory cortex. *Nature* 426:442-446.
- 689 Xue M, Atallah BV, Scanziani M (2014) Equalizing excitation-inhibition ratios across visual  
690 cortical neurons. *Nature* 511:596-600.
- 691 Yekhlef L, Breschi GL, Lagostena L, Russo G, Taverna S (2015) Selective activation of  
692 parvalbumin- or somatostatin-expressing interneurons triggers epileptic seizurelike  
693 activity in mouse medial entorhinal cortex. *J Neurophysiol* 113:1616-1630.
- 694 Yonekawa WD, Kupferberg HJ, Woodbury DM (1980) Relationship between pentylenetetrazol-  
695 induced seizures and brain pentylenetetrazol levels in mice. *J Pharmacol Exp Ther*  
696 214:589-593.
- 697 Zhang ZJ, Koifman J, Shin DS, Ye H, Florez CM, Zhang L, Valiante TA, Carlen PL (2012)  
698 Transition to seizure: ictal discharge is preceded by exhausted presynaptic GABA  
699 release in the hippocampal CA3 region. *J Neurosci* 32:2499-2512.
- 700 Ziburkus J, Cressman JR, Schiff SJ (2013) Seizures as imbalanced up states: excitatory and  
701 inhibitory conductances during seizure-like events. *J Neurophysiol* 109:1296-1306.
- 702 Ziburkus J, Cressman JR, Barreto E, Schiff SJ (2006) Interneuron and pyramidal cell interplay  
703 during in vitro seizure-like events. *J Neurophysiol* 95:3948-3954.

704

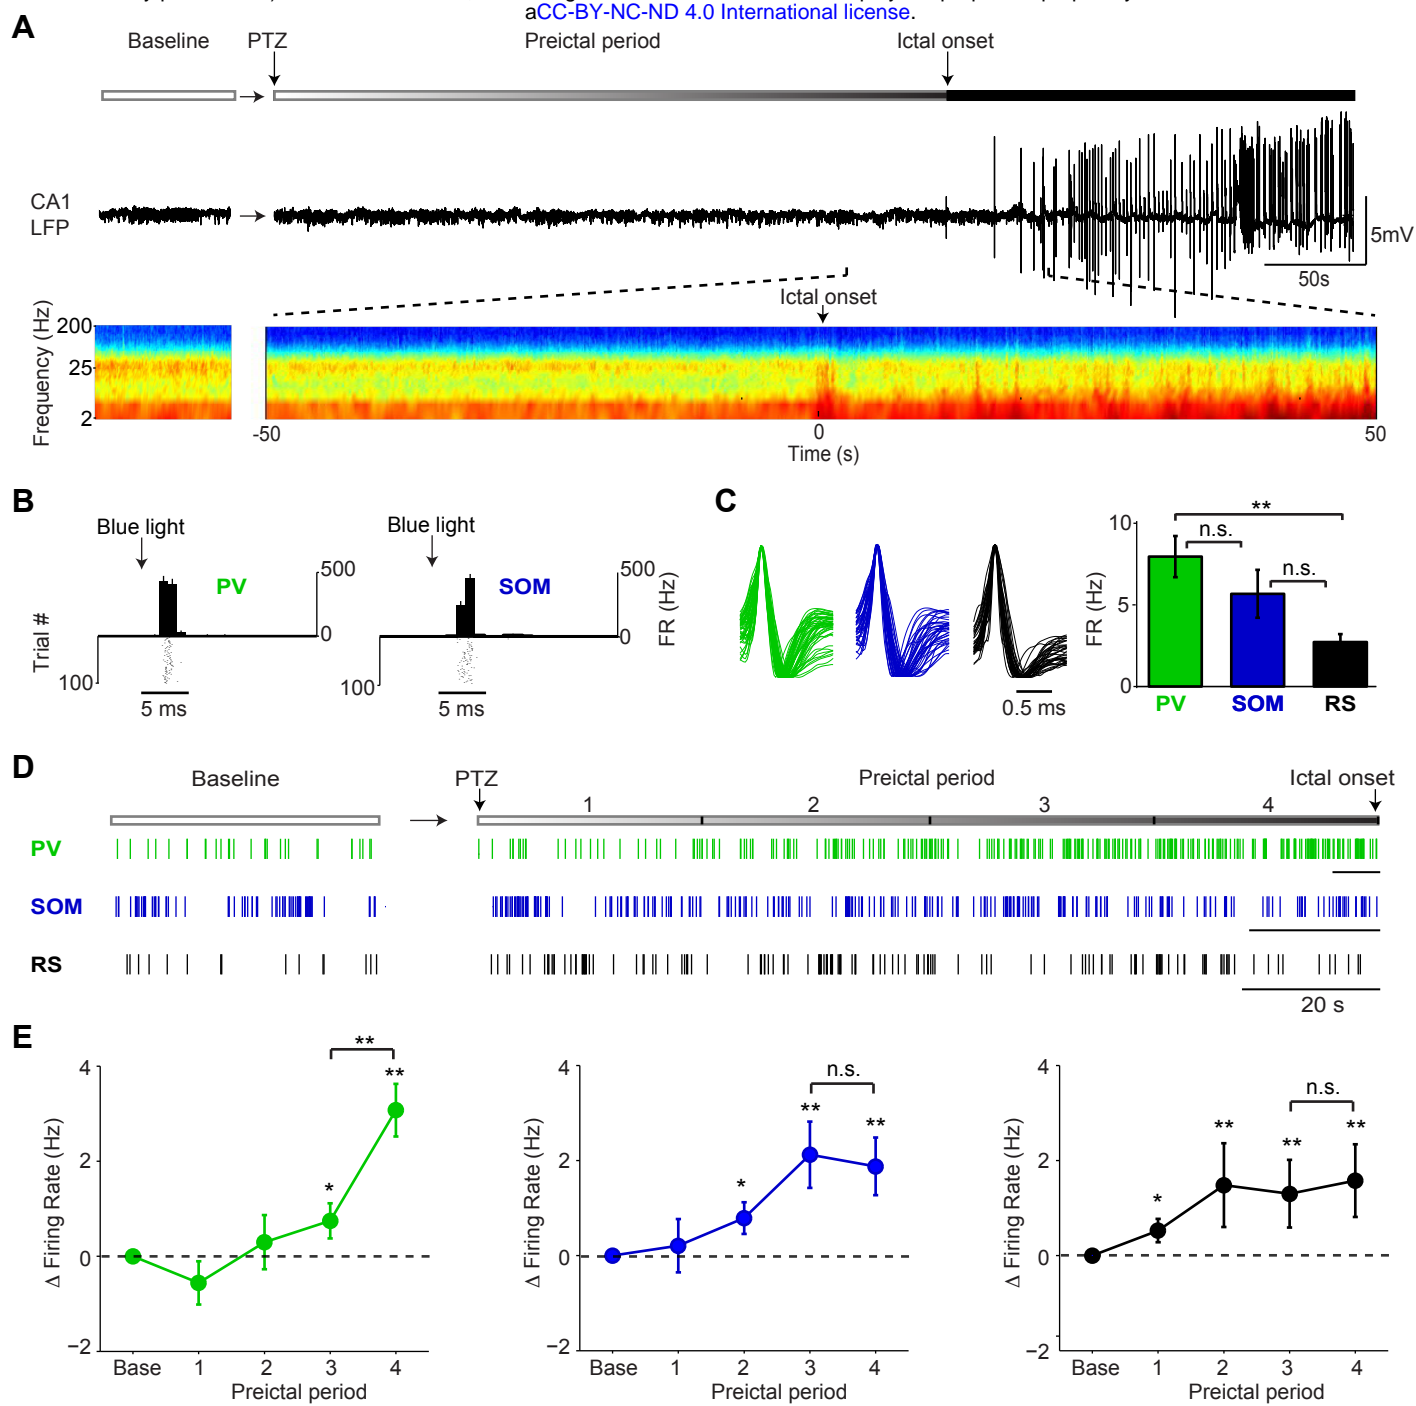

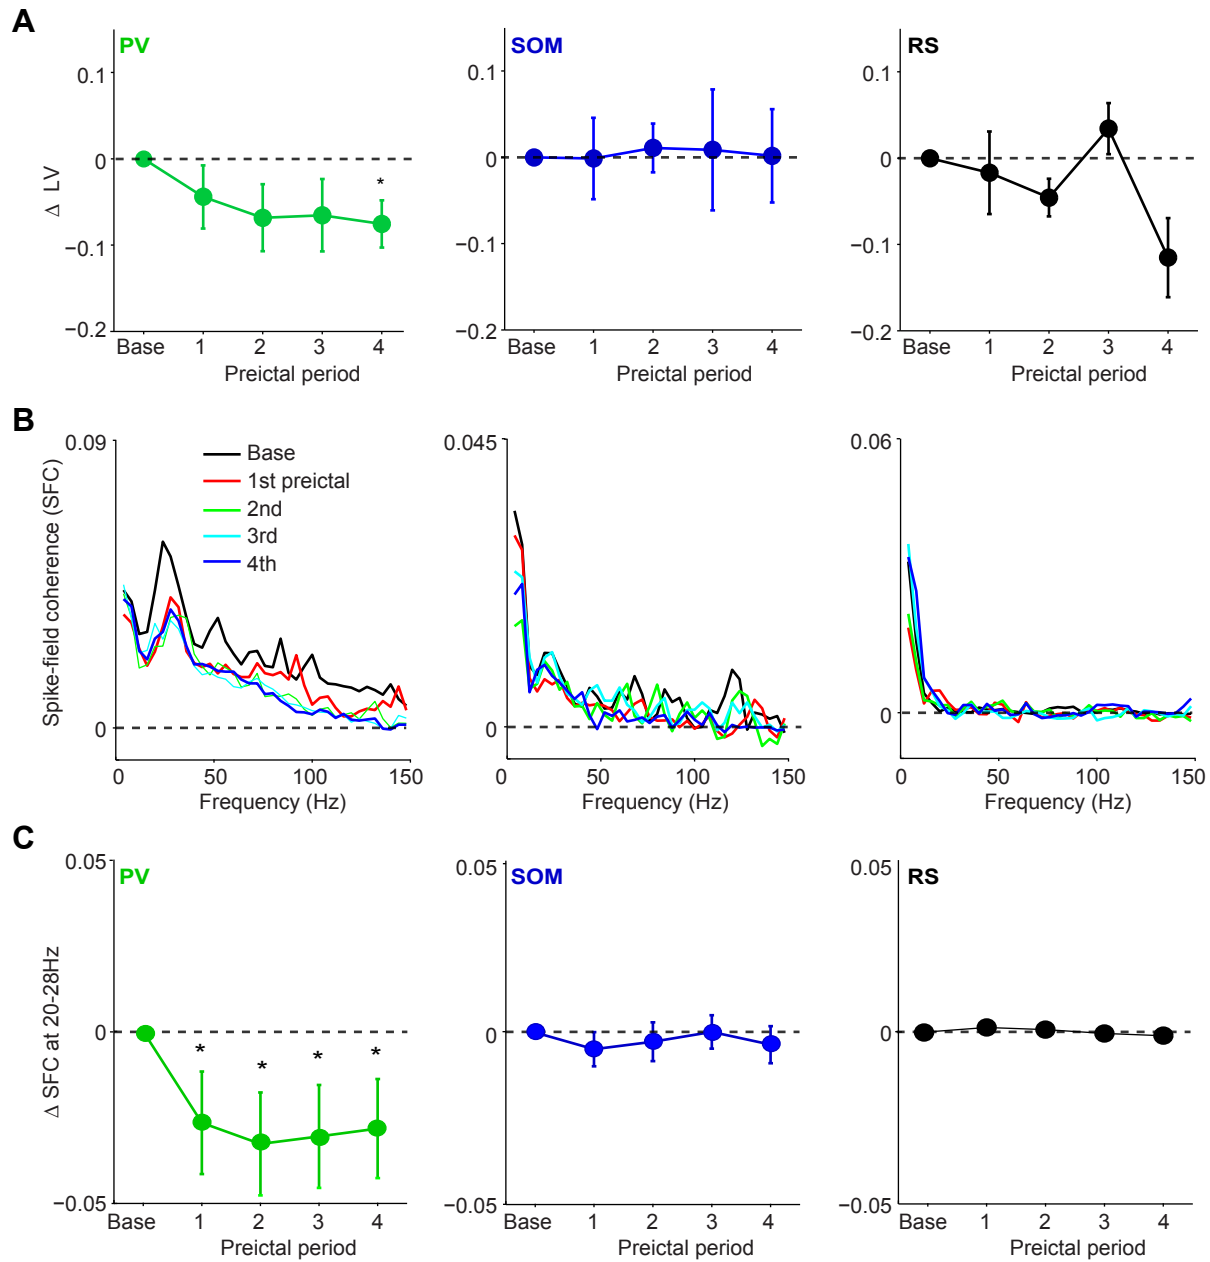



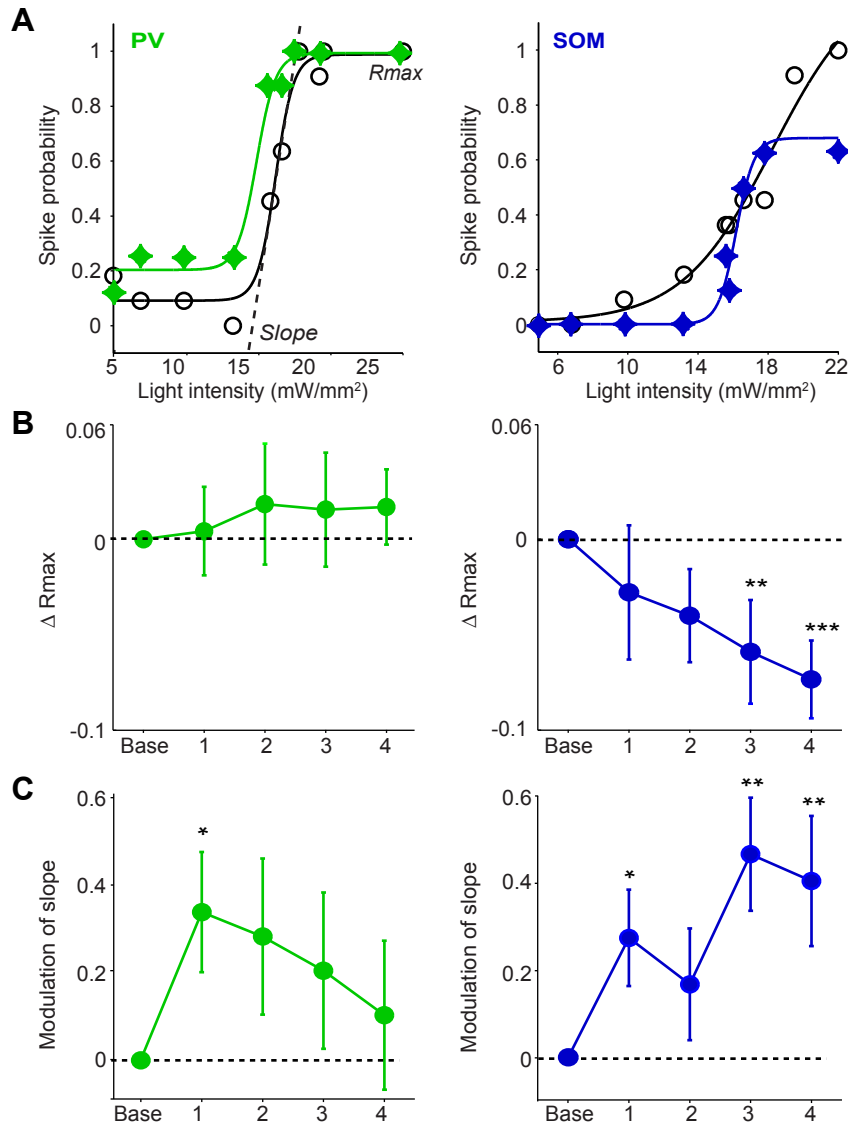

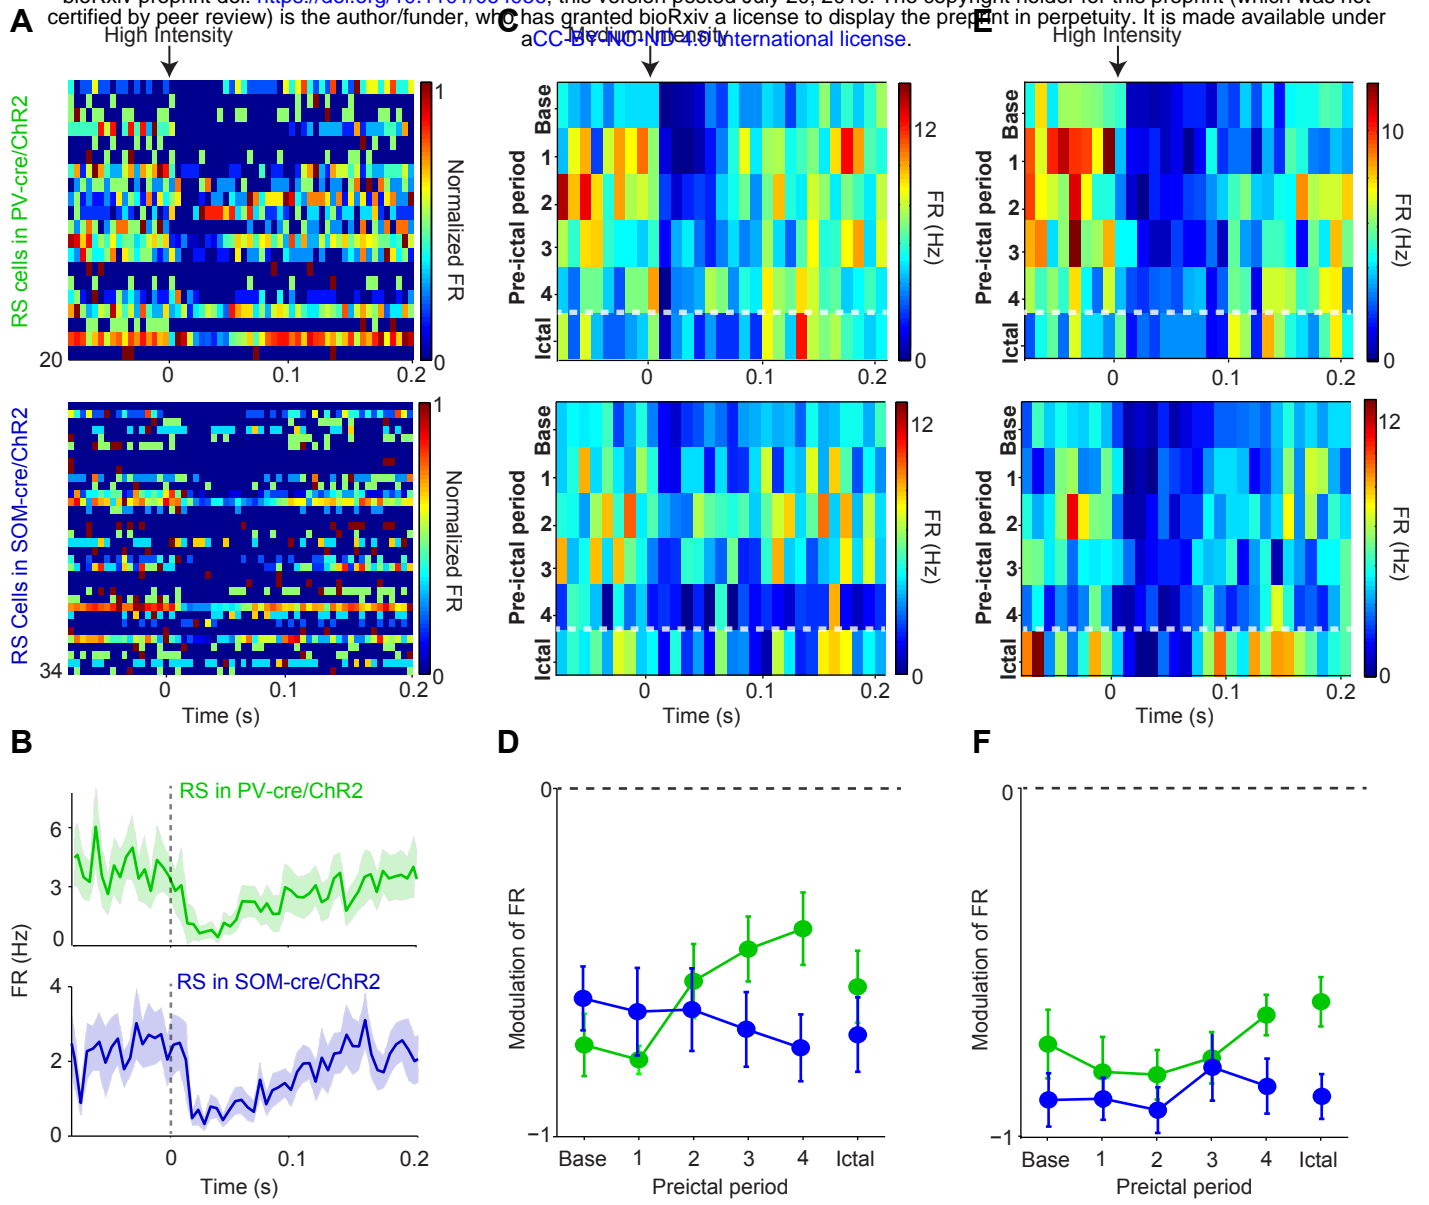

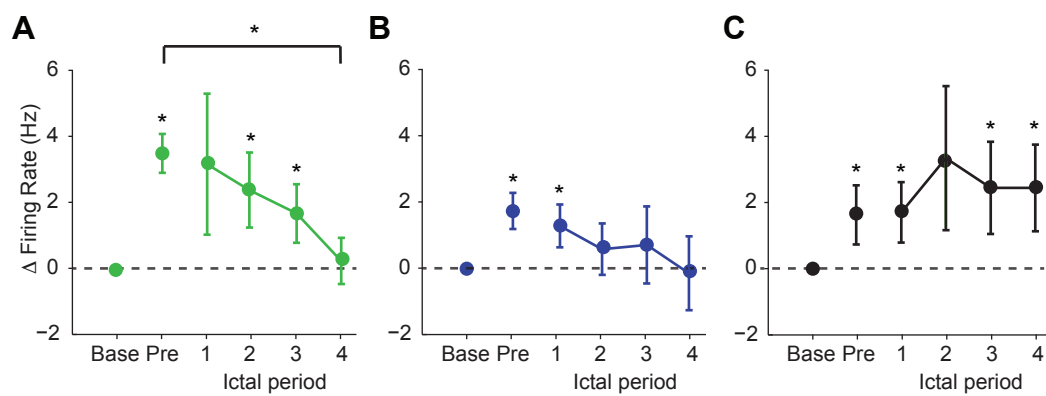

Miri et al., Figure 5
